# Supplementary material for: Sodium Thiosulfate Reduces Acute Kidney Injury in Patients Undergoing Cytoreductive Surgery Plus Hyperthermic Intraperitoneal Chemotherapy with Cisplatin: A Single-Center Observational Study
Source: Springer Nature journal article supplement (doi:10.1245/s10434-021-10508-x), 2021-08-04
Supplement: MOESM1 [file 19542606]

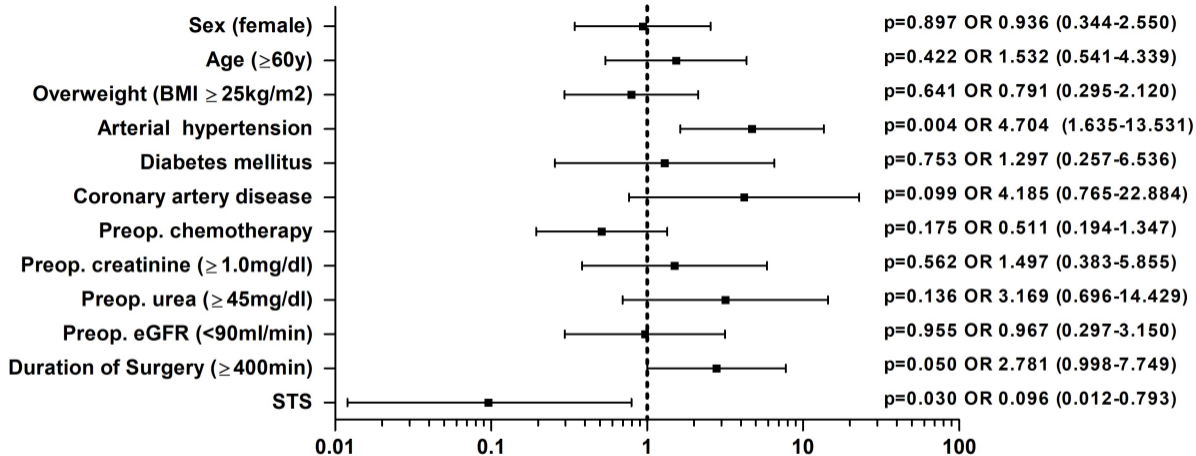

**SUPPLEMENTARY FIGURE 1:** Multivariate analysis of potential risk factors for postoperative acute kidney injury (AKI) AKIN stage  $\geq 2$  following CRS and HIPEC. OR - Odds Ratio (95% confidence interval); BMI- body mass index; Preop.- preoperative; eGFR- estimated glomerular filtration rate.
